# Supplementary material for: Hierarchical alginate biopolymer papers produced via lanthanide ion coordination
Source: Royal Society of Chemistry journal article supplement (doi:10.1039/c6ra11729e), 2016-01-01
Supplement: c6ra11729e1.pdf [file c6ra11729e1.pdf]

## Supporting Information

### **Hierarchical Alginate Biopolymer Papers Produced via Lanthanide Ions Coordination**

Shunli Liu,<sup>a</sup> Jun Ling,<sup>b</sup> Kewen Li,<sup>a</sup> Fang Yao,<sup>a</sup> Olayinka Oderinde,<sup>a</sup> Zhihong Zhang,<sup>\*c</sup>  
Guodong Fu<sup>\*c</sup>

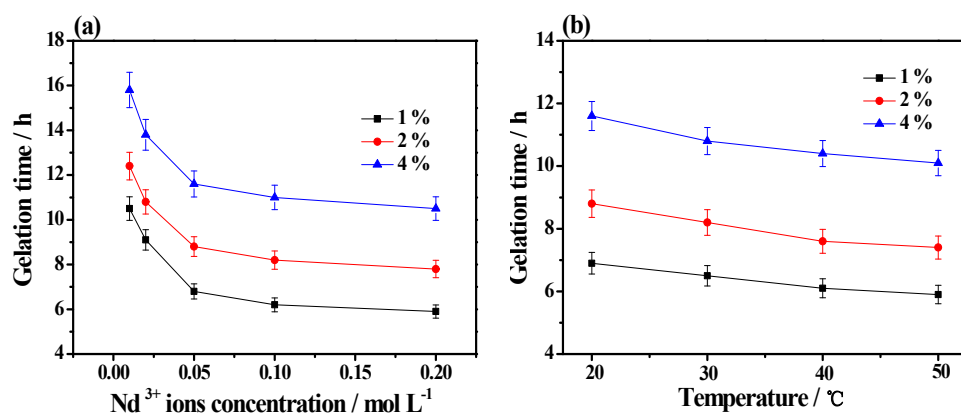

**Fig. S1** Effect of (a)  $\text{Nd}^{3+}$  ion concentrations (0.01, 0.02, 0.05, 0.1, and 0.2 M) and (b) temperature on gelation time.

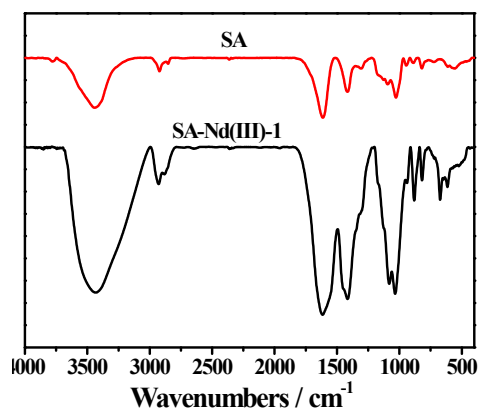

**Fig. S2** FTIR spectral analysis of SA biopolymers and SA-Nd(III)-1 paper.

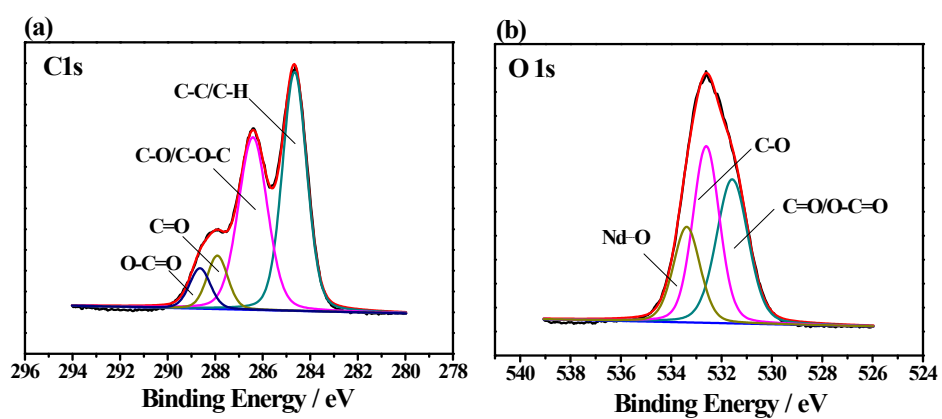

**Fig. S3** XPS spectra of (a) core-level *C1s* and (b) core-level *O1s* of the layered SA-Nd(III)-1 paper.

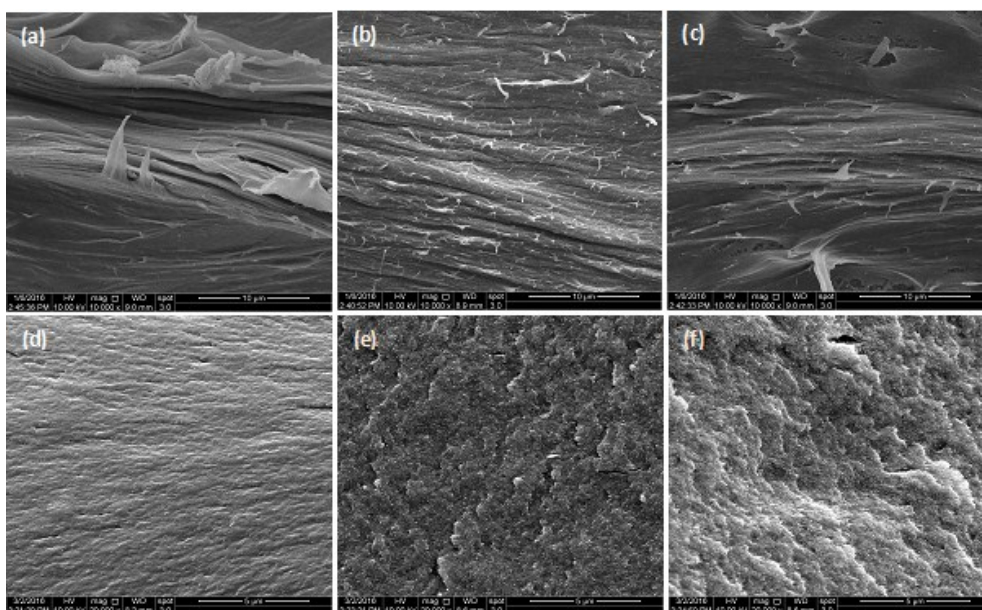

**Figure S4.** Comparison of the cross-sectional morphology and structure of the (a) SA-Gd(III), (b) SA-Ce(III), (c) SA-Yb(III), (d) SA-Ca(II), (e) SA-Fe(III), and (f) SA-Al(III) papers (SA concentrations was 2 wt %).

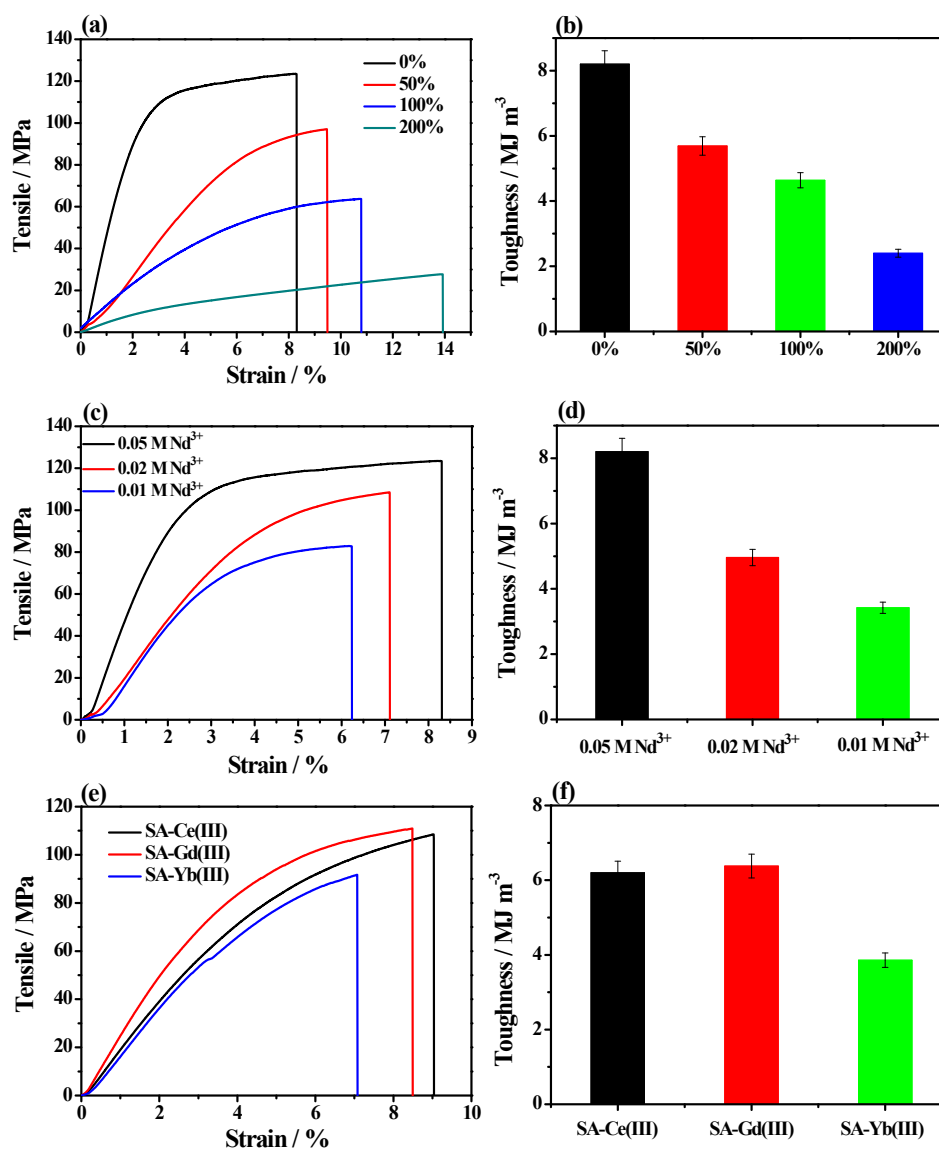

**Fig. S5** (a-b) Typical strain-stress curves and toughness of layered SA-Nd(III)-1 papers with different water contents. (c-d) Typical strain-stress curves and toughness of layered SA-Nd(III) papers which formed under different Nd<sup>3+</sup> ions concentrations. (e-f) Typical strain-stress curves and toughness of layered SA-Ce(III), SA-Gd(III) and SA-Yb(III) papers (SA, 2 wt%).

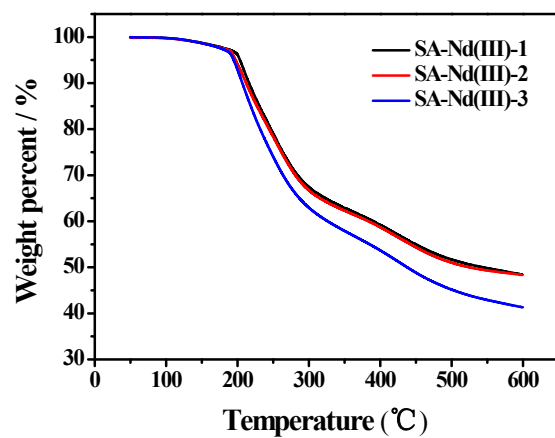

**Fig. S6** TGA curves of SA-Nd(III)-1, SA-Nd(III)-2, SA-Nd(III)-3 layered papers. The curves were obtained under atmosphere of nitrogen with a temperature rising rate of  $10^{\circ}\text{C}\cdot\text{min}^{-1}$

**Table S1.** Atomic % of the SA-Nd(III)-2 paper before (a) and after (b) dipping in sodium chloride solution.

| <b>Samples</b>            | <b>C (%)</b> | <b>N (%)</b> | <b>Nd (%)</b> | <b>Na (%)</b> |
|---------------------------|--------------|--------------|---------------|---------------|
| <sup>a</sup> SA-Nd(III)-2 | 51.0         | 44.87        | 3.92          | 0.21          |
| <sup>b</sup> SA-Nd(III)-2 | 51.23        | 44.64        | 3.90          | 0.23          |

**Table S2.** The tensile strength and young's modulus of Alginate-based materials.

| <b>Samples</b>             | <b>tensile strength/MPa</b> | <b>Young's modulus/GPa</b> | <b>Ref.</b> |
|----------------------------|-----------------------------|----------------------------|-------------|
| SA/GO                      | 69.32                       | 3.8                        | [33]        |
| Al/GO                      | 113                         | 4.18                       | [34]        |
| SA-rGO                     | 122                         | 4.46                       | [38]        |
| GO/SA                      | 2.33                        | -                          | [39]        |
| Alginate film              | 14                          | 0.2                        | [40]        |
| Alginate-Based Nanofibrous | 7                           | 0.03                       | [41]        |
| Alginate-based film        | 2.9                         | 0.07                       | [42]        |
| Alginate/pectin films      | 75.7                        | -                          | [43]        |
| SA-Nd(III)                 | 124.2                       | 5.25                       | This work   |



**Table S3.** Solvent uptake rate of the SA-Nd(III) hydrogel in various solvent.

| Solvent uptake<br>rate / % | SA-Nd(III) papers  |                   |
|----------------------------|--------------------|-------------------|
|                            | 25°C <sup>a</sup>  | 90°C <sup>b</sup> |
| Water                      | 12.82 <sup>c</sup> | 18.34             |
| Ethanol                    | 6.19               | 7.67              |
| THF                        | 4.42               | 5.58              |
| DMF                        | 3.07               | 4.15              |
| DMSO                       | 4.63               | 5.88              |
| EDTA                       | d                  | d                 |

<sup>a</sup> The sample was soaked in solvent at 25°C for 24 h. <sup>b</sup> The sample was soaked in solvent at 25°C for three days, 90°C for 4 h in a sealed vessel. <sup>c</sup> The calculation formula of the solvent uptake rate:  $(W_{\text{wet}} - W_{\text{dry}})/W_{\text{dry}} \times 100\%$ . <sup>d</sup> The sample was dissolved in this solvent.
